# Supplementary material
Source: Royal Society of Chemistry journal article supplement (https://www.rsc.org/suppdata/p2/1999/1869/903865e.doc)
Supplement: Supplementary file 1 [file 903865e.doc]

**Supplementary Material for**

**Alkoxy Isothiocyanates. By A.T. Bech, R. Flammang, C. Th. Pedersen, M.W. Wong and C. Wentrup**

**Table S1 Cartesian Coordinates of MeO-N=C=S and *iso*-PrO-N=C=Sa**

–––––––––––––––––––––––––––––––––––––––––––––––––––––––––––––––––––––––––––––––––––––––––

MeO-N=C=S (**2)**

N 0.249097 0.000000 -0.562912

C 0.309885 0.000000 0.658363

S 0.607820 0.000000 2.206976

O -0.948829 0.000000 -1.274814

C -0.653087 0.000000 -2.675190

H -1.633494 0.000000 -3.156050

H -0.092730 -0.897476 -2.957847

H -0.092730 0.897476 -2.957847

*iso*-Pr-O-N=C=S (**9**)

O -0.173617 0.627867 -0.482905

N 0.156822 -0.245002 0.549158

C -0.659468 -0.838273 1.236333

C 1.038120 1.130538 -1.112360

C 0.544316 2.249594 -2.019222

C 1.768854 0.018352 -1.853956

S -1.542184 -1.688768 2.231582

H 1.674585 1.538669 -0.317320

H 0.010412 3.011755 -1.443912

H -0.130405 1.855298 -2.786771

H 1.395410 2.722837 -2.519629

H 2.037979 -0.791081 -1.168736

H 1.137795 -0.392201 -2.649935

H 2.689427 0.405828 -2.304645

–––––––––––––––––––––––––––––––––––––––––––––––––––––––––––––––––––––––––––––––––––––––––

a B3LYP/6-31G* optimized geometry.

**Table S2 Calculated IR Spectra of MeO-N=C=S and *iso*-PrO-N=C=Sa,b**

––––––––––––––––––––––––––––––––––––––––––––––––––––––––––––––––––––––

B3LYP/6-31G* MP2/6-31G*

––––––––––––––––––––––––––––––––––––––––––––––––––––––––––––––––––––––

MeO-N=C=S (**2)**

3046 (13) 3055 (10)

3007 (33) 3025 (26)

2936 (59) 2934 (46)

1909 (553) 1862 (511)

1476 (25) 1479 (22)

1443 (6) 1448 (6)

1427 (8) 1423 (7)

1183 (2) 1173 (1)

1139 (1) 1133 (1)

1063 (171) 1067 (136)

951 (5) 955 (5)

755 (117) 732 (152)

515 (42) 501 (42)

382 (3) 374 (24)

380 (22) 352 (2)

218 (1) 220 (1)

134 (8) 124 (13)

73 (4) 65 (5)

*iso*-Pr-O-N=C=S (**9**)

3020 (22) 3033 (15)

3018 (20) 3031 (13)

3014 (41) 3026 (24)

3004 (9) 3017 (10)

2945 (14) 2937 (10)

2938 (14) 2934 (24)

2937 (21) 2932 (7)

1917 (637) 1868 (593)

1480 (6) 1482 (8)

1463 (5) 1465 (5)

1458 (1) 1459 (1)

1452 (1) 1454 (1)

1389 (14) 1387 (19)

1377 (21) 1380 (30)

1342 (24) 1344 (11)

1325 (30) 1320 (39)

1167 (3) 1173 (5)

1138 (57) 1151 (37)

1107 (47) 1115 (56)

1023 (139) 1027 (86)

924 (0) 930 (0)

911 (1) 914 (5)

894 (10) 907 (3)

801 (4) 810 (5)

783 (98) 764 (143)

535 (61) 520 (65)

446 (3) 447 (3)

424 (11) 422 (11)

382 (2) 351 (2)

321 (1) 320 (1)

264 (11) 265 (9)

238 (5) 244 (9)

208 (0) 213 (0)

126 (0) 131 (1)

97 (4) 90 (7)

54 (1) 47 (1)

––––––––––––––––––––––––––––––––––––––––––––––––––––––––––––––––––––––

a Frequency in cm-1 and intensity (given in parentheses) in km mol-1.

b B3LYP and MP2 frequencies were scaled by 0.9613 and 0.9427, respectively.
